# Supplementary material for: Medium-Term Effects of Sprinkler Irrigation Combined with a Single Compost Application on Water and Rice Productivity and Food Safety
Source: MDPI journal article supplement (doi:10.3390/plants12030456), 2023-01-19
Supplement: s1 [file s1]

**Supplementary Material “Medium-term effects of sprinkler irrigation combined with a single compost application on water and rice productivity and food safety”**

**Table S1.** Effects of different management systems on soil physicochemical properties (0-20cm depht).

|       | TOC<br>(g kg <sup>-1</sup> ) | FA<br>(g kg <sup>-1</sup> ) | HA<br>(g kg <sup>-1</sup> ) | EC<br>(dS m <sup>-1</sup> ) | pH     | N<br>(g kg <sup>-1</sup> ) | P<br>(mg kg <sup>-1</sup> ) | AS<br>(%) |
|-------|------------------------------|-----------------------------|-----------------------------|-----------------------------|--------|----------------------------|-----------------------------|-----------|
| 2018  |                              |                             |                             |                             |        |                            |                             |           |
| SNT   | 11.1aA                       | 0.559aA                     | 0.869aA                     | 1.45aA                      | 6.73dB | 1.16aA                     | 36.9aA                      | 56.5bA    |
| SNT-C | 16.8bA                       | 1.05dA                      | 1.53bA                      | 1.79bA                      | 6.94eB | 1.77bA                     | 48.5dA                      | 50.9abA   |
| ST    | 10.2aA                       | 0.891bA                     | 0.911aA                     | 1.87bA                      | 6.27cA | 1.10aA                     | 51.2eB                      | 43.6aA    |
| ST-C  | 16.6bA                       | 1.25eA                      | 1.41bA                      | 2.08cA                      | 6.89eB | 1.88bA                     | 46.2cA                      | 51.4abA   |
| FT    | 10.8aB                       | 0.831bA                     | 0.858aA                     | 1.93bA                      | 5.52aA | 1.23aA                     | 40.2bA                      | 53.7abA   |
| FT-C  | 20.9cA                       | 0.971cA                     | 1.48bA                      | 1.52aA                      | 5.92bA | 2.07cA                     | 41.4bB                      | 68.4cA    |
| 2019  |                              |                             |                             |                             |        |                            |                             |           |
| SNT   | 12.3cA                       | 0.775aB                     | 0.958bA                     | 5.97dB                      | 6.46dA | 1.35aB                     | 41.4abA                     | 72.3bcdB  |
| SNT-C | 21.6eB                       | 1.04bA                      | 1.96dA                      | 3.73cB                      | 6.61eA | 2.20dB                     | 57.8cB                      | 81.6dB    |
| ST    | 11.6bB                       | 1.00bA                      | 0.736aA                     | 2.12aA                      | 6.29cA | 1.32aA                     | 40.3abA                     | 63.7abB   |
| ST-C  | 18.6dB                       | 1.18cA                      | 1.30cA                      | 3.93cB                      | 6.62eA | 1.84bA                     | 44.1bA                      | 67.8abcB  |
| FT    | 10.1aA                       | 0.939bA                     | 0.833abA                    | 2.74bB                      | 5.64aB | 1.35aA                     | 35.2aA                      | 58.1aA    |
| FT-C  | 21.4eA                       | 0.996bA                     | 1.44cA                      | 2.65bB                      | 6.11bB | 2.03cA                     | 38.2abA                     | 78.1cdA   |
| Y     | ***                          | *                           | NS                          | ***                         | ***    | ***                        | NS                          | ***       |
| T     | ***                          | ***                         | ***                         | ***                         | ***    | ***                        | ***                         | **        |
| Y x T | **                           | NS                          | *                           | ***                         | ***    | **                         | ***                         | *         |

TOC: Total Organic Carbon; FA: Fulvic Acid; HA: Humic Acid; EC: Electrical Conductivity; N: Total Nitrogen; P: Available Phosphorus; AS: Aggregate stability. ANOVA factors are Y: Year; T: Treatment; Y x T: Interaction Year \* Treatment. F-values indicate the significance levels \* p<0.05; \*\* p<0.01; \*\*\* p<0.001, respectively, and NS: not significant. Different letters indicate differences (p<0.05) between treatments in the same year (lower case letters) and between years within the same treatment (upper case letters)

The soil physicochemical properties were analysed as described Cabrera et al. (2010).

Cabrera, D.; López-Piñero, A.; Albarrán, A.; Peña, D. Direct and residual effects on diuron behaviour and persistence following two-phase olive mill waste addition to soil: Field and laboratory experiments. *Geoderma* 2010, 157, 133–141. <https://doi:10.1016/j.geoderma.2010.04.004>.

**Table S2.** Properties of compost used in the experiment.

| Properties                | Value |
|---------------------------|-------|
| pH                        | 7.71  |
| EC (dS m <sup>-1</sup> )  | 2.32  |
| TOC (g kg <sup>-1</sup> ) | 382   |
| N <sub>T</sub> (%)        | 2.17  |
| C/N                       | 17.6  |
| As (mg kg <sup>-1</sup> ) | 4.00  |
| Cd (mg kg <sup>-1</sup> ) | 0.148 |

EC: Electrical Conductivity; TOC: Total Organic Carbon; N: Total Nitrogen

**Table S3.** Mean maximum (Max) and minimum (Min) temperatures, rainfall and rice evapotranspiration (ET<sub>c</sub>), registered at the field location during 2018 and 2019

| 2018      |                  |                  |                  |                         |
|-----------|------------------|------------------|------------------|-------------------------|
| Month     | Max Temp<br>(°C) | Min Temp<br>(°C) | Rainfall<br>(mm) | ET <sub>c</sub><br>(mm) |
| January   | 13.3             | 3.20             | 43.4             | -                       |
| February  | 15.1             | 1.22             | 24.7             | -                       |
| March     | 15.8             | 6.11             | 173              | -                       |
| April     | 19.9             | 7.91             | 78.2             | -                       |
| May       | 23.4             | 9.43             | 36.8             | 125                     |
| June      | 28.7             | 13.9             | 12.6             | 169                     |
| July      | 31.0             | 14.8             | 0                | 223                     |
| August    | 36.4             | 17.6             | 0                | 224                     |
| September | 32.8             | 16.4             | 18.3             | 122                     |
| October   | 27.3             | 10.1             | 27.7             | -                       |
| November  | 16.7             | 6.37             | 78.8             | -                       |
| December  | 13.0             | 2.22             | 17.7             | -                       |
| 2019      |                  |                  |                  |                         |
| Month     | Max Temp<br>(°C) | Min Temp<br>(°C) | Rainfall<br>(mm) | ET <sub>c</sub><br>(mm) |
| January   | 14.1             | 0.08             | 28.5             | -                       |
| February  | 17.6             | 1.99             | 17.9             | -                       |
| March     | 20.8             | 3.51             | 22.3             | -                       |
| April     | 20.7             | 7.22             | 38.8             | -                       |
| May       | 27.9             | 10.4             | 6.0              | 143                     |
| June      | 28.8             | 12.1             | 1.41             | 175                     |
| July      | 32.7             | 15.8             | 1.41             | 241                     |
| August    | 33.7             | 15.9             | 0                | 202                     |
| September | 30.7             | 14.1             | 8.84             | 123                     |
| October   | 28.5             | 11.5             | 7.84             | -                       |
| November  | 17.1             | 8.96             | 82.6             | -                       |
| December  | 16.0             | 6.21             | 79.4             | -                       |

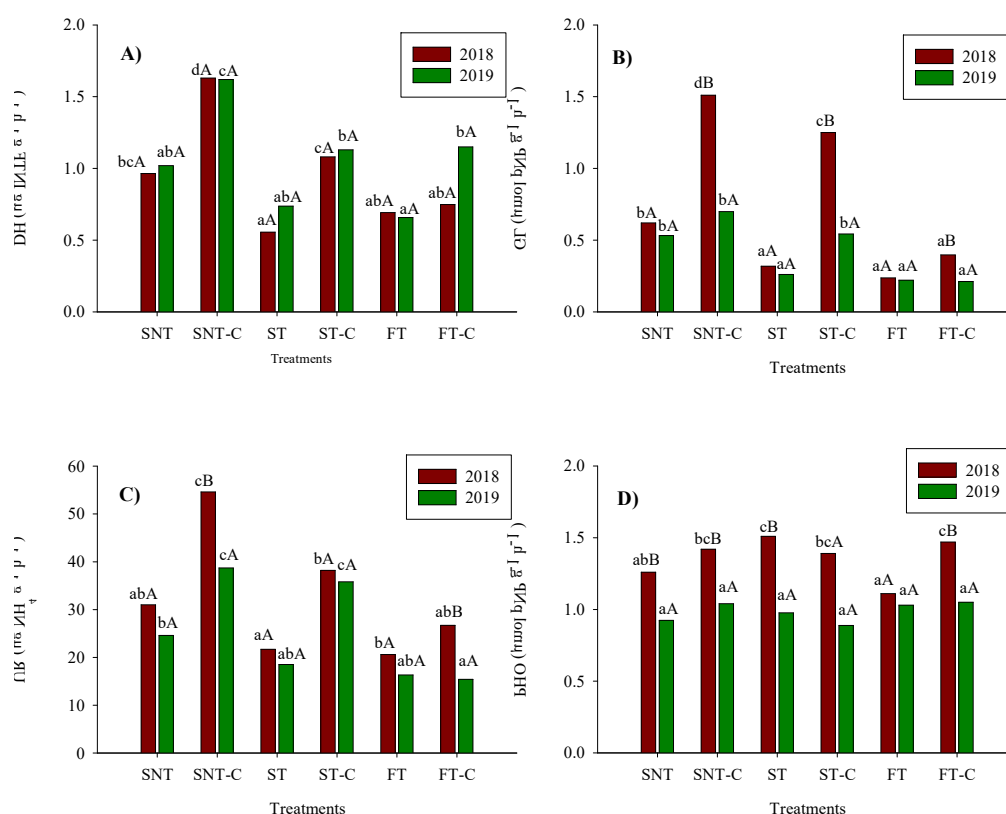

**Figure S1.** Effects of different management systems on dehydrogenase activity (A), B-glucosidase (B), Urease (C) and Phosphatase (D) (0-10cm depth). Different letters indicate differences ( $p < 0.05$ ) between treatments in the same year (lower case letters) and between years within the same treatment (upper case letters).

Dehydrogenase (DH),  $\beta$ -glucosidase (GL), Urease (UR) and Phosphatase (PHO) were determined in the soils samples as described by López-Piñero et al. (2011).

López-Piñero, A.; Albarrán, A.; Rato-Nunes, J.M.; Peña, D.; Cabrera, D. Long-term impacts of de-oiled two-phase olive mill waste on soil chemical properties, enzyme activities and productivity in an olive grove. *Soil Tillage Res.* 2011, 114, 175-18. <https://doi.org/10.1016/j.still.2011.05.002>.
